# Supplementary material for: Development of a Neighbourhood Walkability Index for Porto Metropolitan Area. How Strongly Is Walkability Associated with Walking for Transport?
Source: MDPI journal article supplement (doi:10.3390/ijerph15122767), 2018-12-06
Supplement: s1 [file s1]

**Table S1.** Crude and adjusted associations between the neighbourhood walkability index and the proportion of residents walking from/to work/school (threshold distance equal to 400 m).

|                                 | Walking from/to Work/School<br>OR and 95% CI <sup>1</sup> | Walking from/to Work/School<br>AOR and 95% CI <sup>2</sup> |
|---------------------------------|-----------------------------------------------------------|------------------------------------------------------------|
| Neighbourhood walkability index |                                                           |                                                            |
| Q1—least walkable               | 1.00                                                      | 1.00                                                       |
| Q2                              | 1.13 (1.09–1.16)                                          | 1.14 (1.11–1.18)                                           |
| Q3                              | 1.26 (1.23–1.30)                                          | 1.30 (1.26–1.34)                                           |
| Q4                              | 1.40 (1.37–1.44)                                          | 1.47 (1.43–1.52)                                           |
| Q5—most walkable                | 1.59 (1.55–1.64)                                          | 1.72 (1.67–1.77)                                           |

<sup>1</sup> Odds ratio (OR) and 95% Confidence Intervals. <sup>2</sup> Adjusted Odds ratio (AOR) and 95% Confidence Intervals. Adjusted for the proportion of active-age population, 15–64 years, proportion of men, proportion of employed people, the proportion of people working in other municipalities and the neighbourhood socioeconomic deprivation score.
